# Supplementary material for: A modular approach for molecular recognition by zinc dipicolinate complexes
Source: Royal Society of Chemistry journal article supplement (doi:10.1039/c5dt00652j), 2015-01-01
Supplement: c5dt00652j1.pdf [file c5dt00652j1.pdf]

# **Supplementary Information:**

## **A modular approach for molecular recognition by zinc dipicolinate complexes**

Krapa Shankar, Alexander M. Kirillov and Jubaraj B. Baruah

### **List of supporting information:**

Figure 1S: <sup>1</sup>H-NMR spectra (DMSO-d<sub>6</sub>) of 1,3-bis(4-pyridine)propane, 2,7-dihydroxynaphthalene, mixture of 1,3-bis(4-pyridine)propane and 1,3-bis(4-pyridine)propane, and complex **4**.

Figure 2S: <sup>1</sup>H-NMR (DMSO-d<sub>6</sub>) spectra of (i) 4,4'-bipyridine, (ii) 2,7-dihydroxynaphthalene, (iii) 1:1 mixture of 4,4'-bipyridine and 2,7-dihydroxynaphthalene, and (iv) complex **5**.

Figure 3S: <sup>1</sup>H-NMR spectra (DMSO-d<sub>6</sub>) of 4,4'-bipyridine, pyrogallol, mixture of 4,4'-bipyridine and pyrogallol, and complex **6**.

Figure 4S: <sup>1</sup>H-NMR spectra (DMSO-d<sub>6</sub>) of 1,3-bis(4-pyridine)propane, 2,6-dihydroxynaphthalene, mixture of 1,3-bis(4-pyridine)propane and 2,6-dihydroxynaphthalene, and complex **7**.

Figure 5S: Thermogram of Complex **1**

Figure 6S: Thermogram of Complex **2**

Figure 7S: Thermogram of Complex **3**

Figure 8S: Thermogram of Complex **4**

Figure 9S: Thermogram of Complex **5**

Figure 10S: Thermogram of Complex **6**

Figure 11S: Thermogram of Complex **7**

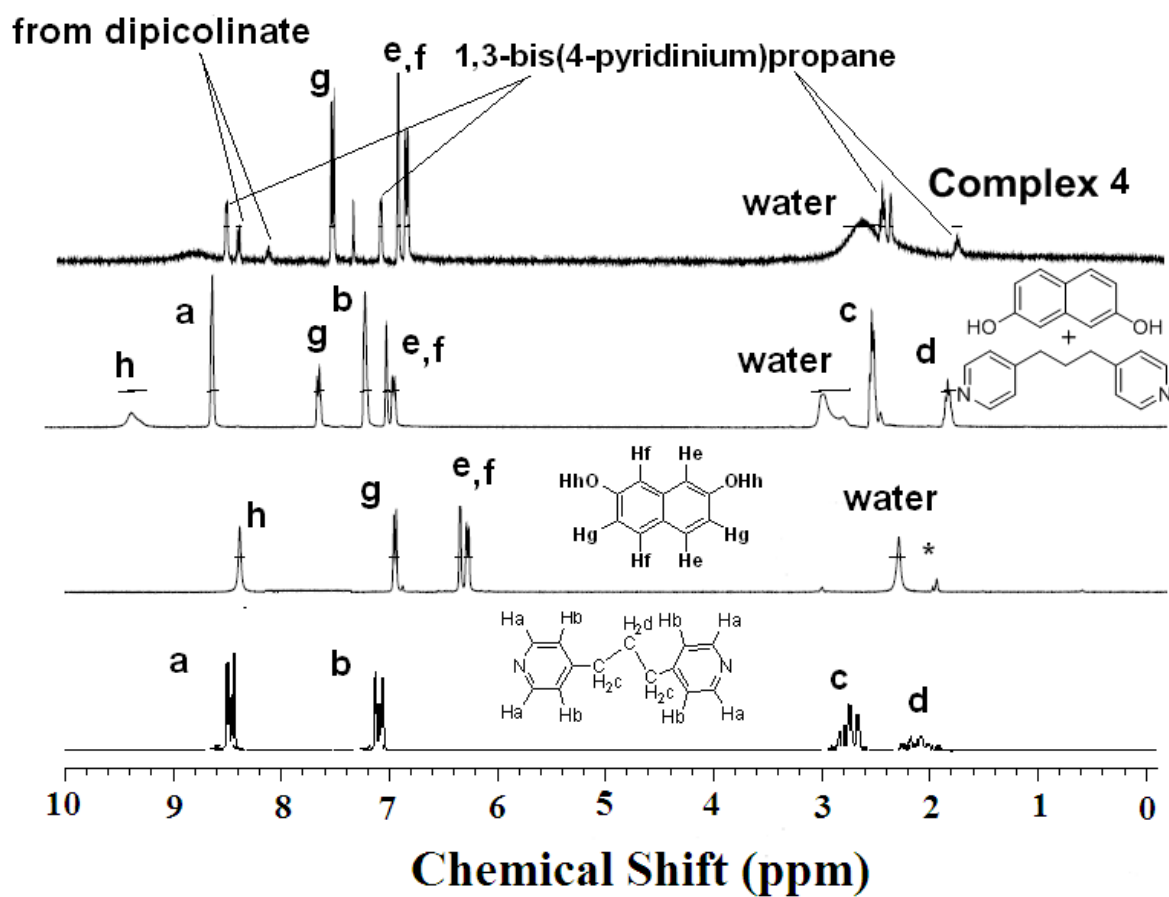

Figure 1S:  $^1\text{H}$ -NMR spectra ( $\text{DMSO-d}_6$ ) of 1,3-bis(4-pyridine)propane, 2,7-dihydroxynaphthalene, mixture of 1,3-bis(4-pyridine)propane and 1,3-bis(4-pyridine)propane, and complex 4.

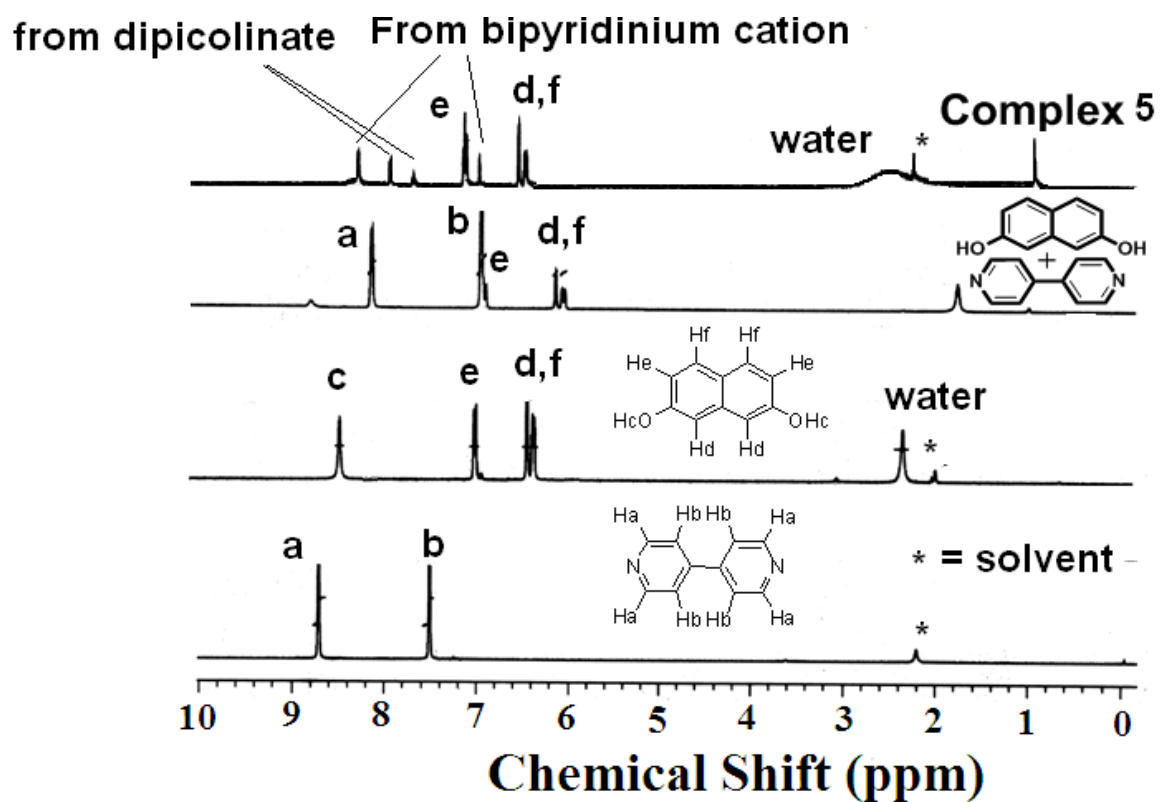

Figure 2S:  $^1\text{H}$ -NMR ( $\text{DMSO-d}_6$ ) spectra of (i) 4,4'-bipyridine, (ii) 2,7-dihydroxynaphthalene, (iii) 1:1 mixture of 4,4'-bipyridine and 2,7-dihydroxynaphthalene, and (iv) complex **5**.

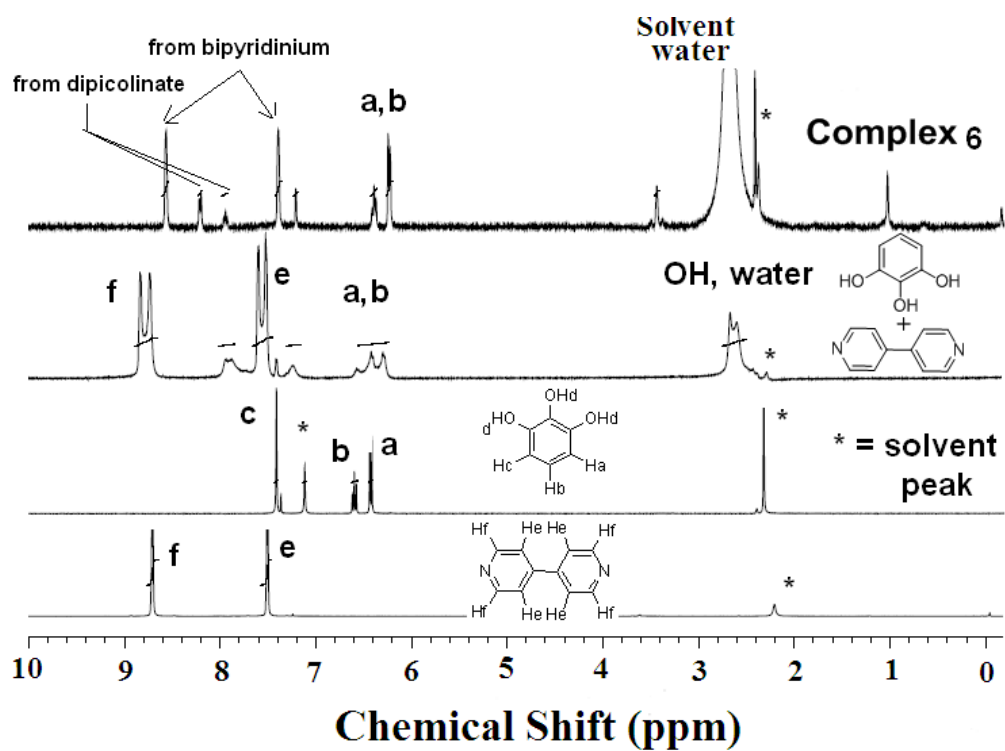

Figure 3S:  $^1\text{H}$ -NMR spectra (DMSO- $\text{d}_6$ ) of 4,4'-bipyridine, pyrogallol, mixture of 4,4'-bipyridine and pyrogallol, and complex 6.

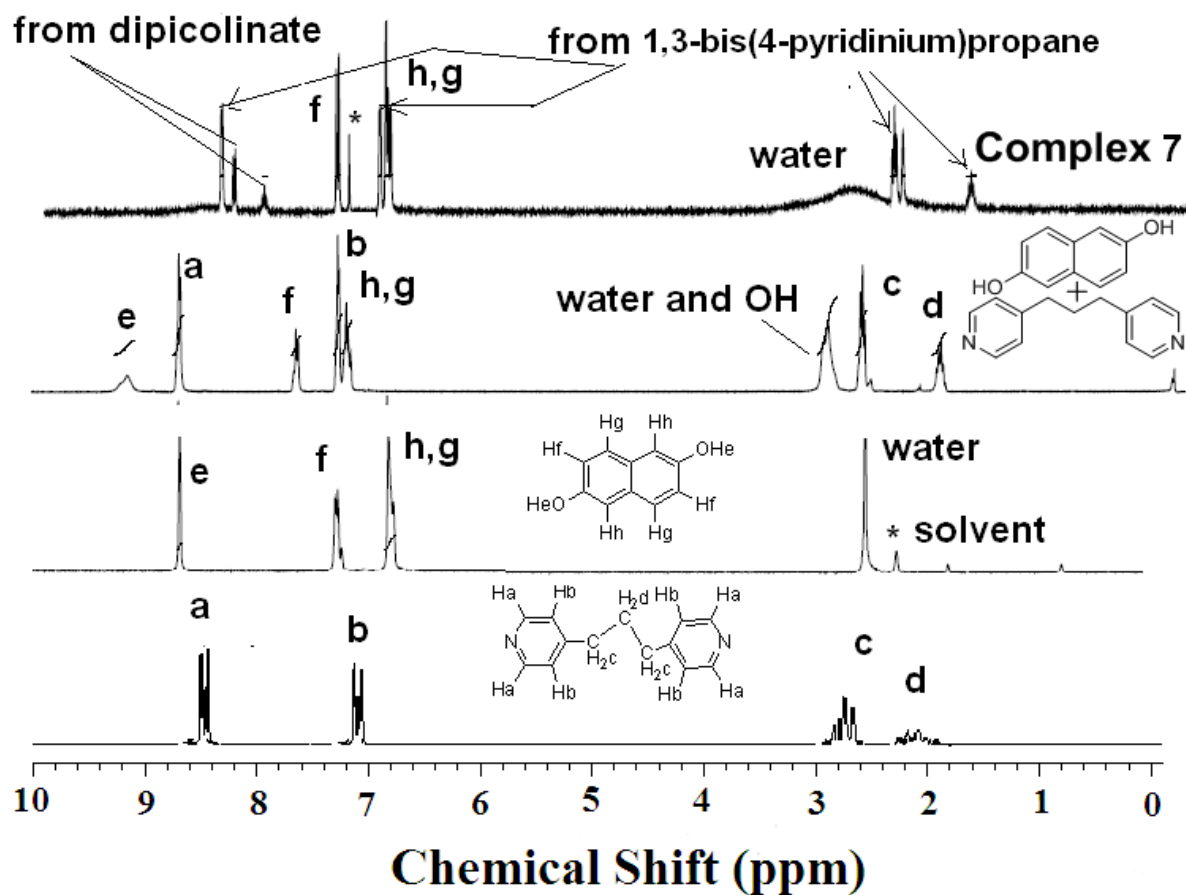

Figure 4S:  $^1\text{H}$ -NMR spectra(DMSO- $\text{d}_6$ ) of 1,3-bis(4-pyridine)propane, 2,6-dihydroxynaphthalene, mixture of 1,3-bis(4-pyridine)propane and 2,6-dihydroxynaphthalene, and complex 7.

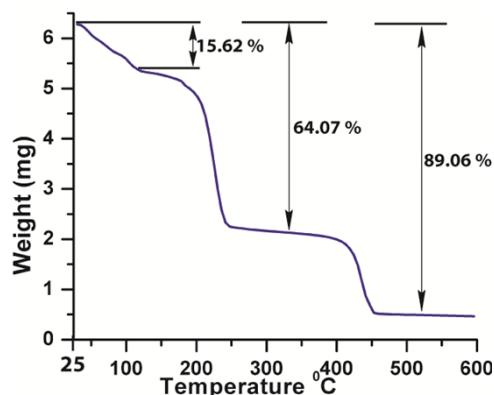

Figure 5S: Thermogram of complex 1

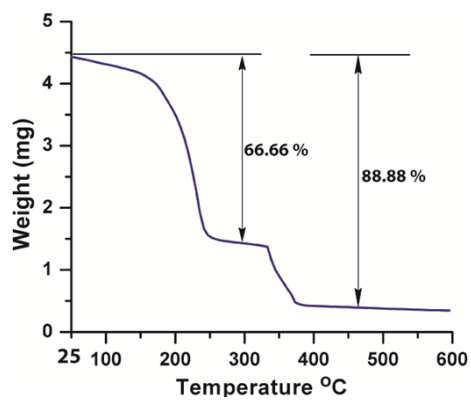

Figure 6S: Thermogram of complex 2

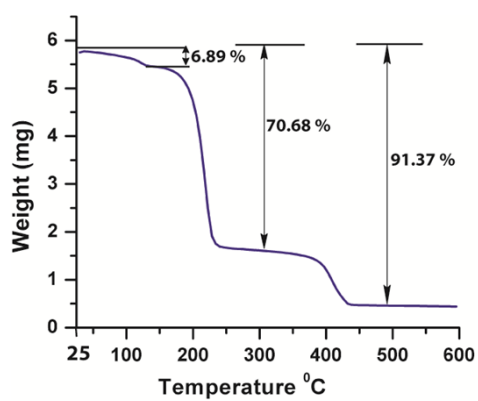

Figure 7S: Thermogram of complex 3

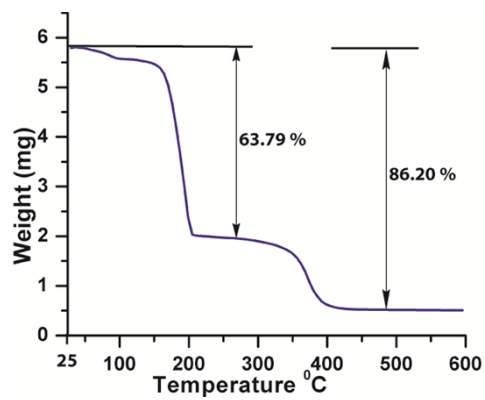

Figure 8S: Thermogram of complex 4

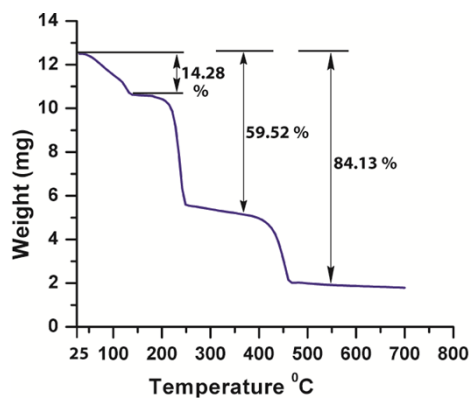

Figure 9S: Thermogram of complex 5

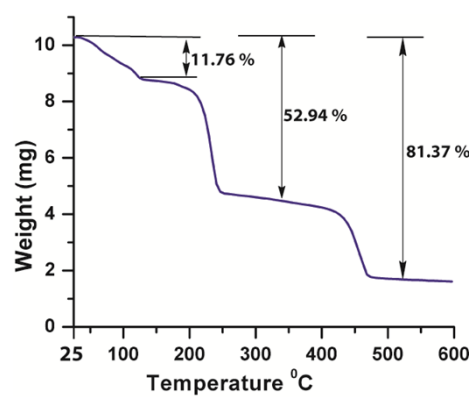

Figure 10S: Thermogram of complex 6

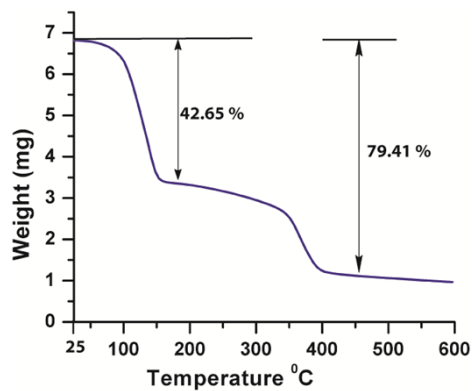

Figure 11S: Thermogram of complex 7
